# Supplementary material
Source: HighWire-hosted journal article supplement (https://jitc.bmj.com/content/12/7/e009281)
Supplement: inline-supplementary-material-1 [file inline-supplementary-material-1.pdf]

**Supplementary Table S1 Primary antibodies for immunohistochemistry (IHC)**

| <b>Antibody</b>                                              | <b>Catalog NO.</b> | <b>Vendor</b>             | <b>Dilution</b> |
|--------------------------------------------------------------|--------------------|---------------------------|-----------------|
| Anti-NNMT                                                    | sc-376048          | Santa Cruz Biotechnology  | 1:100           |
| Anti-CD206                                                   | AF2534             | R&D Systems, Minneapolis  | 1:2000          |
| Anti-F4/80                                                   | 70076              | Cell Signaling Technology | 1:1000          |
| Anti-Arginase 1                                              | 3668               | Cell Signaling Technology | 1:1000          |
| Anti-CD204                                                   | AF1797             | R&D Systems, Minneapolis  | 1:2000          |
| Anti-iNOS                                                    | ab3523             | Abcam                     | 1:500           |
| Anti-PDGFR $\alpha$                                          | 3174               | Cell Signaling Technology | 1:100           |
| Anti-CD68                                                    | ZM-0060            | ZSGB-BIO                  | 1:100           |
| Anti-cytokeratin                                             | ZM-0067            | ZSGB-BIO                  | 1:100           |
| horseradish<br>peroxidase-conjugated<br>secondary antibodies | 7074               | Cell Signaling Technology | 1:2000          |

**Supplementary Table S2 The expression levels of NNMT of UBC patients in the SYSMH cohort and the SYSUCC cohort**

| <b>The intensity score</b> | <b>SYSMH cohort<br/>(cohort A)</b> | <b>SYSUCC cohort<br/>(cohort B)</b> |
|----------------------------|------------------------------------|-------------------------------------|
| 0                          | 19 (10.73%)                        | 5 (3.125%)                          |
| 1+                         | 32 (18.08%)                        | 76 (47.5%)                          |
| 2+                         | 57 (32.21%)                        | 23 (14.375%)                        |
| 3+                         | 69 (38.98%)                        | 56 (35%)                            |

**NOTE:** The staining intensity score was classified as follows: 0 (no staining), 1+ (weak staining), 2+ (moderate staining), or 3+ (strong staining).

Abbreviations: NNMT, nicotinamide N-methyltransferase; UBC, urothelial bladder cancer.

Supplementary Table S3 Oligonucleotides of RT-qPCR Primers used in the study

| Targets            | Forward Seq                    | Reverse Seq                   |
|--------------------|--------------------------------|-------------------------------|
| NNMT               | 5'-GTTTGGTTCTAGGCACTCTG-3'     | 5'-GCAGGTTCTGGTCTGAGTA-3'     |
| SAA1               | 5'-CCAATCTCCGACCTGCTG-3'       | 5'-GCTTTGTATCCCTGCCCTGAG-3'   |
| PDGFR $\alpha$     | 5'-CCATTAACCATGTGCCCGAG-3'     | 5'-AGATCAGGAAGTTGGCCGAT-3'    |
| FAP                | 5'-TGAACGAGTATGTTTGCAGTGG-3'   | 5'-GGTCTTTGGACAATCCCATGT-3'   |
| SPARC              | 5'-CCCATTGGCGAGTTTGAGAAG-3'    | 5'-CAAGGCCCGATGTAGTCCA-3'     |
| ACTA2              | 5'-GTGTTGCCCTGAAGAGCAT-3'      | 5'-GCTGGGACATTGAAAGTCTCA-3'   |
| CD14               | 5'-ACGCCAGAACCTTGTGAGC-3'      | 5'-GCATGGATCTCCACCTCTACTG-3'  |
| CD163              | 5'-GCGGGAGAGTGGAAGTGAAAG-3'    | 5'-GTTACAAATCACAGAGACCGCT-3'  |
| CD204              | 5'-TCGAGGACTCCCAGGATATG-3'     | 5'-CCCACCGACCAGTCGAAC-3'      |
| CD206              | 5'-CGTTTACCAAATGGCTTCGT-3'     | 5'-CCTTGGCTTCGTGGATTTTCAT-3'  |
| GAPDH              | 5'-ACAACCTTTGGTATCGTGGAAGG-3'  | 5'-GCCATCACGCCACAGTTTC-3'     |
| NNMT mus           | 5'-TGTGCAGAAAACGAGATCCTC-3'    | 5'-AGTTCTCCTTTTACAGCACCCA-3'  |
| Saa3 mus           | 5'-CGCAGCACGAGCAGGAT-3'        | 5'-CCAGGATCAAGATGCAAAGAATG-3' |
| Arg-1 mus          | 5'-CTCCAAGCCAAAGTCCTTAGAG-3'   | 5'-GGAGCTGTCATTAGGGACATCA-3'  |
| Il-4 mus           | 5'-GGTCTCAACCCCCAGCTAGT-3'     | 5'-GCCGATGATCTCTCTCAAGTGAT-3' |
| Il-6 mus           | 5'-CTGCAAGAGACTTCCATCCAG-3'    | 5'-AGTGGTATAGACAGGTCTGTTGG-3' |
| Il-10 mus          | 5'-CTTACTGACTGGCATGAGGATCA-3'  | 5'-GCAGCTCTAGGAGCATGTGG-3'    |
| Il-12 $\alpha$ mus | 5'-CAATCACGCTACCTCCTCTTTT-3'   | 5'-CAGCAGTGCAGGAATAATGTTTC-3' |
| Pu.1 mus           | 5'-GCCTCAGTCACCAGGTTTCC-3'     | 5'-CTCTCACCCCTCCTCCTCATCTG-3' |
| CD206 mus          | 5'-CTCTGTTTCAGCTATTGGACGC-3'   | 5'-TGGCACTCCCAAACATAATTTGA-3' |
| CD86 mus           | 5'-GAGCTGGTAGTATTTTGGCAGG-3'   | 5'-GGCCCAGGTACTIONTGGCATT-3'  |
| iNOS mus           | 5'-GTTCTCAGCCCAACAATAACAAGA-3' | 5'-GTGGACGGGTTCGATGTCAC-3'    |
| PDGFR $\beta$ mus  | 5'-AGGAGTGATAACCAGCTTTAGTCC-3' | 5'-CCGAGCAGGTCAGAACAAAGG-3'   |
| GAPDH mus          | 5'-AGGTCGGTGTGAACGGATTTG-3'    | 5'-GGGGTCGTTGATGGCAACA-3'     |
| Saa3-Chip mus      | 5'-TGTGATCCAGGGAAGTGCAT-3'     | 5'-CAGGAAGCAGGAGTGGGTG-3'     |

**Supplementary Table S4 The association of NNMT<sup>+</sup> CAFs and clinical parameters in UCB patients in the SYSMH cohort and the SYSUCC cohort**

| Variable           | SYSMH cohort (cohort A)<br>(n = 177) |      |      |                  | SYSUCC cohort (cohort B)<br>(n = 160) |      |      |                  |
|--------------------|--------------------------------------|------|------|------------------|---------------------------------------|------|------|------------------|
|                    | Low                                  | High | OR   | P                | Low                                   | High | OR   | P                |
| No. of patients    | 90                                   | 87   |      |                  | 81                                    | 79   |      |                  |
| Age                |                                      |      | 0.86 | 0.605            |                                       |      | 1.49 | 0.208            |
| ≤ 60 years         | 42                                   | 44   |      |                  | 44                                    | 35   |      |                  |
| > 60 years         | 48                                   | 43   |      |                  | 37                                    | 44   |      |                  |
| Sex                |                                      |      | 0.56 | 0.173            |                                       |      | 0.82 | 0.678            |
| Male               | 73                                   | 77   |      |                  | 70                                    | 70   |      |                  |
| Female             | 17                                   | 10   |      |                  | 11                                    | 9    |      |                  |
| Tumor size         |                                      |      | 1.81 | 0.062            |                                       |      | 1.71 | 0.100            |
| ≤ 3cm              | 38                                   | 25   |      |                  | 37                                    | 26   |      |                  |
| > 3cm              | 52                                   | 62   |      |                  | 44                                    | 53   |      |                  |
| Multifocality      |                                      |      | 0.89 | 0.692            |                                       |      | 0.52 | <b>0.039</b>     |
| Unifocal           | 48                                   | 49   |      |                  | 35                                    | 47   |      |                  |
| Multifocal         | 42                                   | 38   |      |                  | 46                                    | 32   |      |                  |
| Tumor stage        |                                      |      | 3.12 | <b>&lt;0.001</b> |                                       |      | 2.55 | <b>0.027</b>     |
| Ta – T1            | 57                                   | 31   |      |                  | 20                                    | 9    |      |                  |
| T2 – T4            | 33                                   | 56   |      |                  | 61                                    | 70   |      |                  |
| Nodal status       |                                      |      | 4.75 | <b>0.001</b>     |                                       |      | 4.08 | <b>0.001</b>     |
| N0                 | 85                                   | 68   |      |                  | 74                                    | 57   |      |                  |
| N1 – N2            | 5                                    | 19   |      |                  | 7                                     | 22   |      |                  |
| Histological grade |                                      |      | 2.83 | <b>&lt;0.001</b> |                                       |      | 3.67 | <b>&lt;0.001</b> |
| Low                | 48                                   | 25   |      |                  | 34                                    | 13   |      |                  |
| High               | 42                                   | 62   |      |                  | 47                                    | 66   |      |                  |

**Note:** Logistic regression analysis; Significant p-values were shown in bold font.

**Abbreviations:** NNMT, nicotinamide N-methyltransferase; UBC, urothelial bladder cancer; OR, odds ratio.
